# Supplementary material
Source: HighWire-hosted journal article supplement (https://jitc.bmj.com/content/13/1/e010162)
Supplement: inline-supplementary-material-4 [file inline-supplementary-material-4.pdf]

Siglec11 promotes M2 macrophage polarization through AKT-mTOR signaling and facilitates the progression of gastric cancer

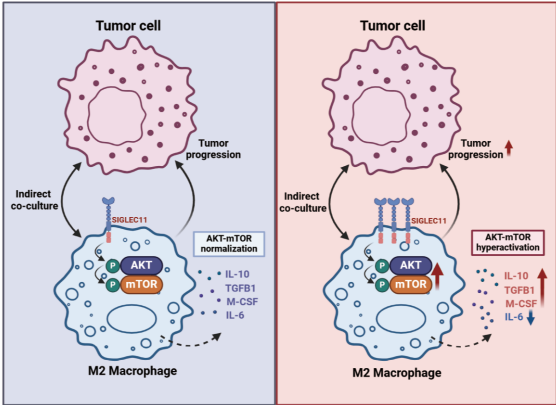

**Authors**  
Jingxin Yin, Yang Lu, Yihao Liu, Qimeng Shi, Minmin Shi, Zhenggang Zhu, Da Fu, Zhenqiang Wang, Chen Li

**Correspondence**  
Chen Li, E-mail: leedocor@sina.com  
Zhenqiang Wang, E-mail: wzq12326@rjh.com.cn  
Da Fu, E-mail: fuda@shsmu.edu.cn

**In Brief**  
SIGLEC11 is upregulated in TAMs, and overexpression of SIGLEC11 promotes not only the polarization of macrophages via AKT-mTOR signaling towards M2 macrophages but also the progression of gastric cancer.
